# Supplementary material
Source: publisher site journal article supplement (https://zookeys.pensoft.net/article/11413/download/suppl/32/)

Supplementary Figure 2

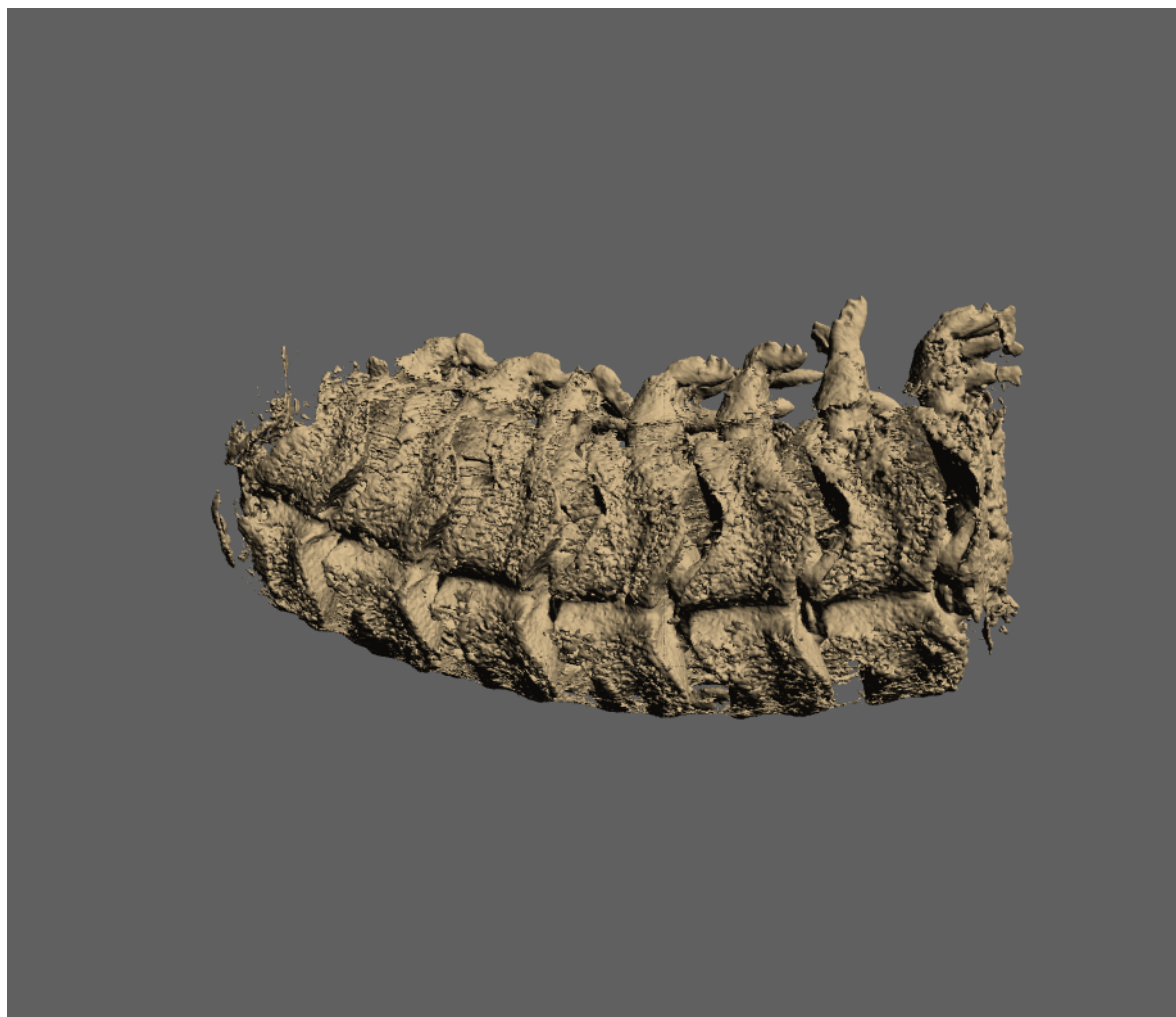

Supplement: Supplementary file
